# Supplementary material for: Peaches Preceded Humans: Fossil Evidence from SW China
Source: PubMed Central journal article supplement (PMC4660870; doi:10.1038/srep16794), 2015-11-26
Supplement: srep16794-s1.pdf [file srep16794-s1.pdf]

## **Peaches Preceded Humans: Fossil Evidence from SW China**

Tao Su<sup>1,2</sup>, Peter Wilf<sup>3</sup>, Yongjiang Huang<sup>2,4</sup>, Shitao Zhang<sup>5</sup>, Zhekun Zhou<sup>1,4</sup>

<sup>1</sup>Key Laboratory of Tropical Forest Ecology, Xishuangbanna Tropical Botanical Garden, Chinese Academy of Sciences, Mengla 666303, China. <sup>2</sup>State Key Laboratory of Paleobiology and Stratigraphy, Nanjing Institute of Geology and Paleontology, Chinese Academy of Sciences, Nanjing 210008, China. <sup>3</sup>Department of Geosciences, Pennsylvania State University, University Park, Pennsylvania 16802, USA. <sup>4</sup>Key Laboratory for Plant Diversity and Biogeography of East Asia, Kunming Institute of Botany, Chinese Academy of Sciences, Kunming 650204, China. <sup>5</sup>Faculty of Land Resource Engineering, Kunming University of Science and Technology, Kunming 650093, China.

Correspondence and requests for materials should be addressed to Z.K.Z. (email: zhouzk@xtbg.ac.cn).

1 **Supplementary Online Materials**

2 **Supplementary Table 1 | Morphological character matrix for *Prunus***  
3 ***kunmingensis* and 36 living *Prunus* species.**

4 **Supplementary Table 2 | Endocarp size in *Prunus kunmingensis* (this study) and**  
5 **archaeological fossils<sup>4</sup>, and endocarps and fruit size in 302 modern peach**  
6 **cultivars<sup>29</sup>.**

7 **Supplementary Table 3 | Results of <sup>14</sup>C dating and elemental analysis for *Prunus***  
8 ***kunmingensis*.** Radiocarbon dating was done in Beta Analytic Inc. (July, 2013), and  
9 elemental analysis of one seed of *P. kunmingensis* was carried out in the Materials  
10 Characterization Laboratory at Pennsylvania State University (November, 2014).

11

12 **Supplementary Animation 1 | Three dimensional reconstruction of a fossil**  
13 **endocarp (KUN PC2015001) from CT data, showing external and internal**  
14 **structures.**

15 **Supplementary Figure 1 | Phylogeny of *Prunus* section *Persica* (redrawn from**  
16 **Yazbek and Oh, 2013<sup>22</sup>) and a summary comparison of endocarp morphology,**  
17 **including the *P. kunmingensis* fossils.**

18 **Supplementary Figure 2 | Ring-cupped oak from the fossil-peach layer. a and b.**  
19 **Fruits with cupule. c. Spiral bracts on the cupule. d-f. Fruits. Scale bars: c = 1 mm;**  
20 **others = 1 cm.**

21 **Supplementary Figure 3 | The proportions of species native to southwestern**  
22 **China in selected economically important genera of Rosaceae. Numbers indicate**

23 how many species are native to southwestern China and all-China, respectively.

24 “Southwestern China” includes Chongqing, Guizhou, Sichuan, southeastern Tibet,

25 and Yunnan, together comprising about 13% of the Chinese land area.

26 **Supplementary Figure 4 | Examples of morphological diversity among**

27 **endocarps in modern peach cultivars.** Specimens were examined at the U.S.

28 National Seed Herbarium. Specimen numbers: a. SPI.65856; b. SPI.41498; c.

29 SPI.41732; d. FPI.102706; e. SPI.131406; f. SPI.43290; g. SPI.41733; h. SPI.36703; i.

30 SPI.41274; j. SPI.43289. Scale bar = 1 cm.

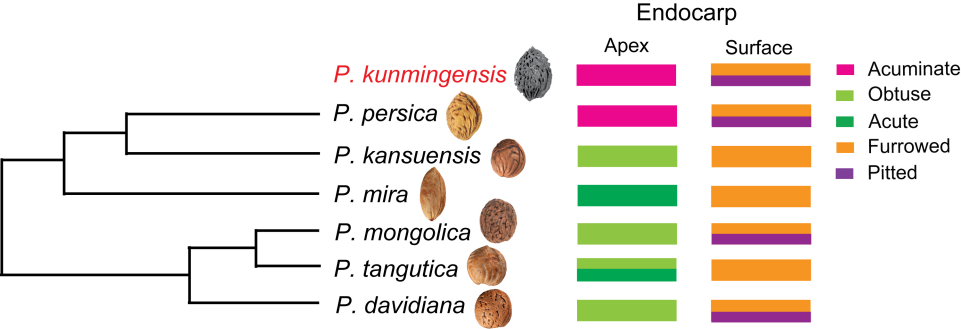

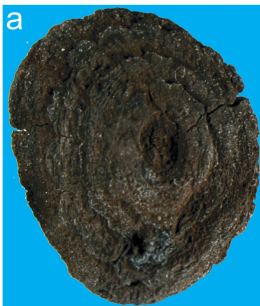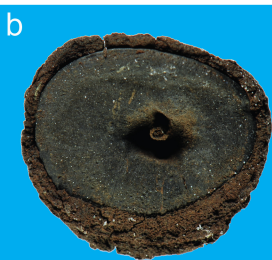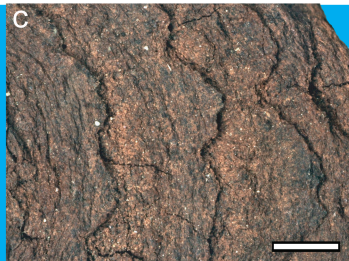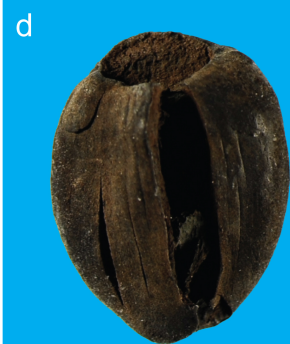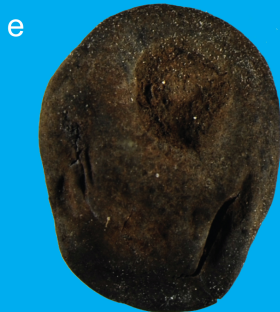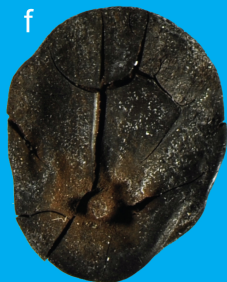

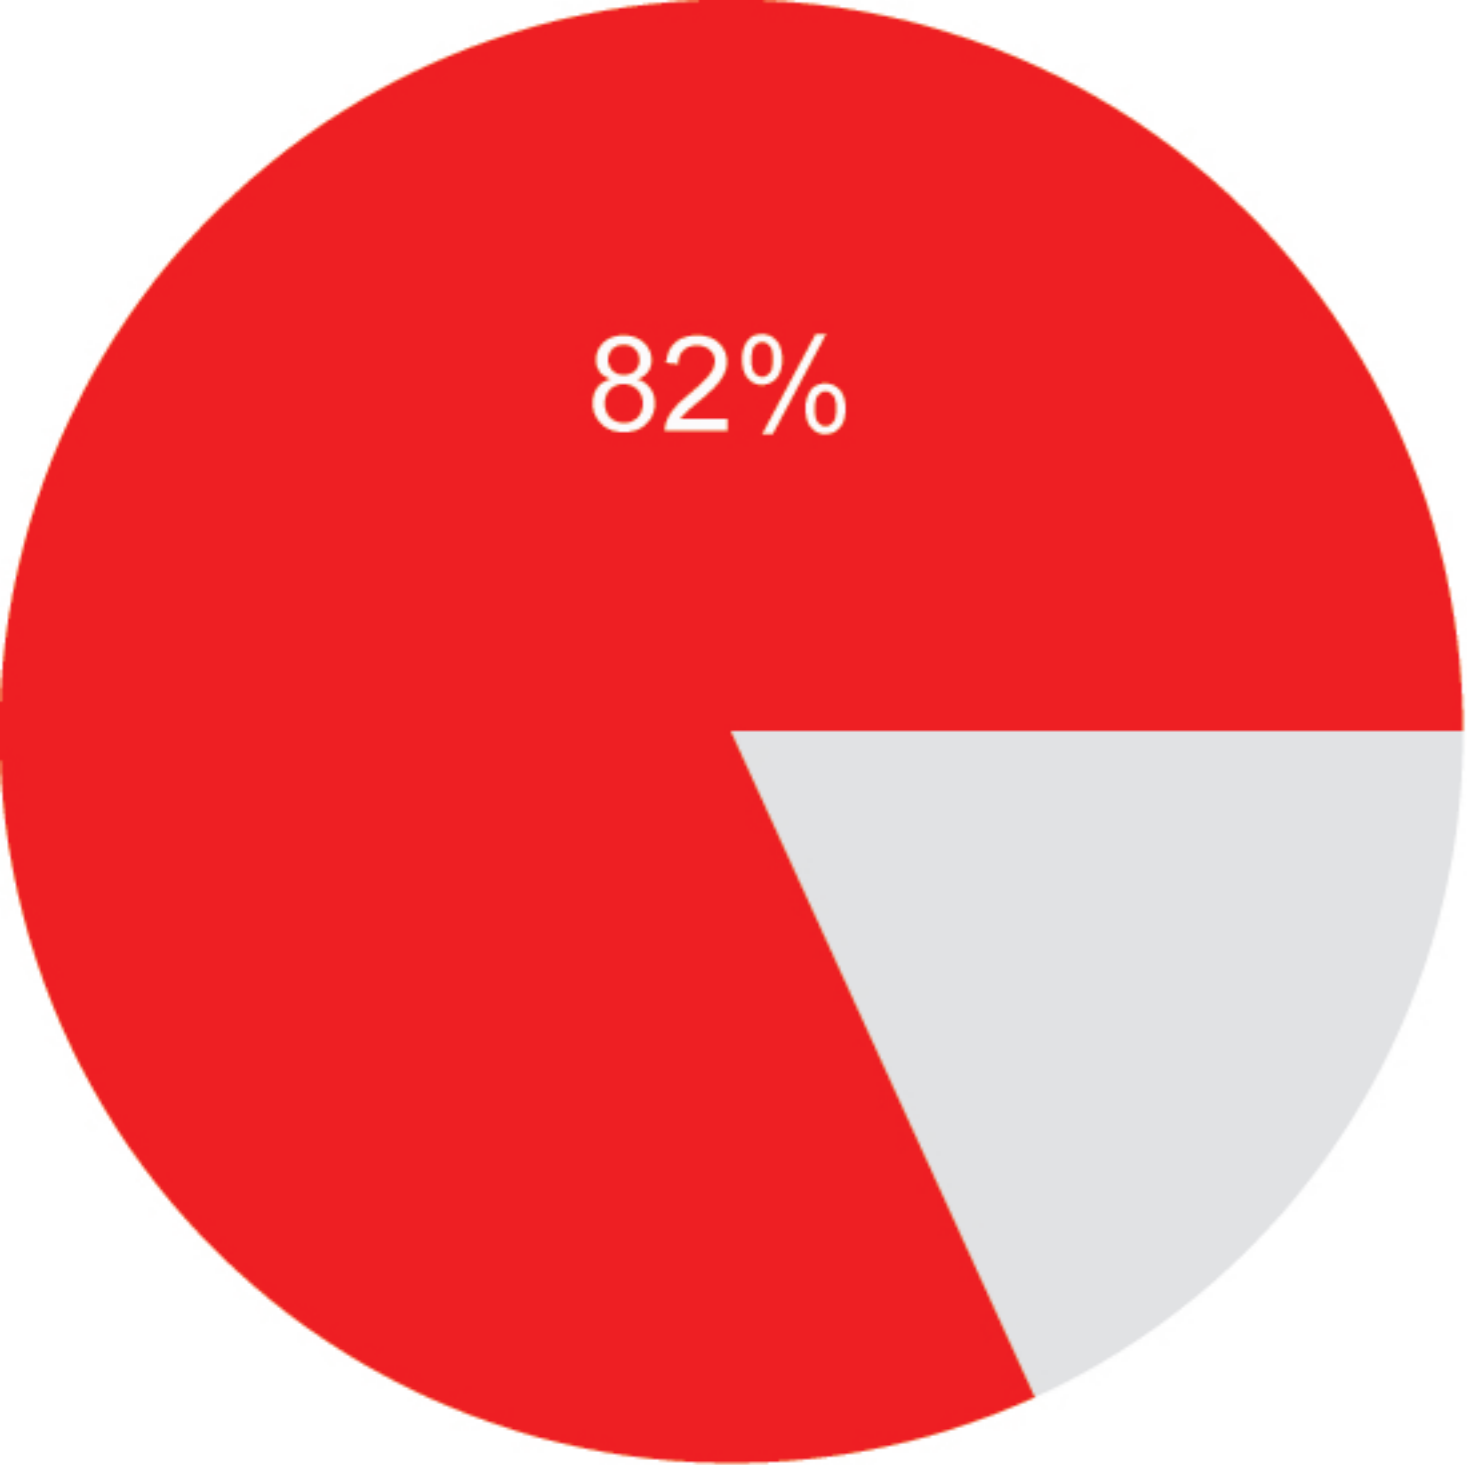

*Malus (18/22)*

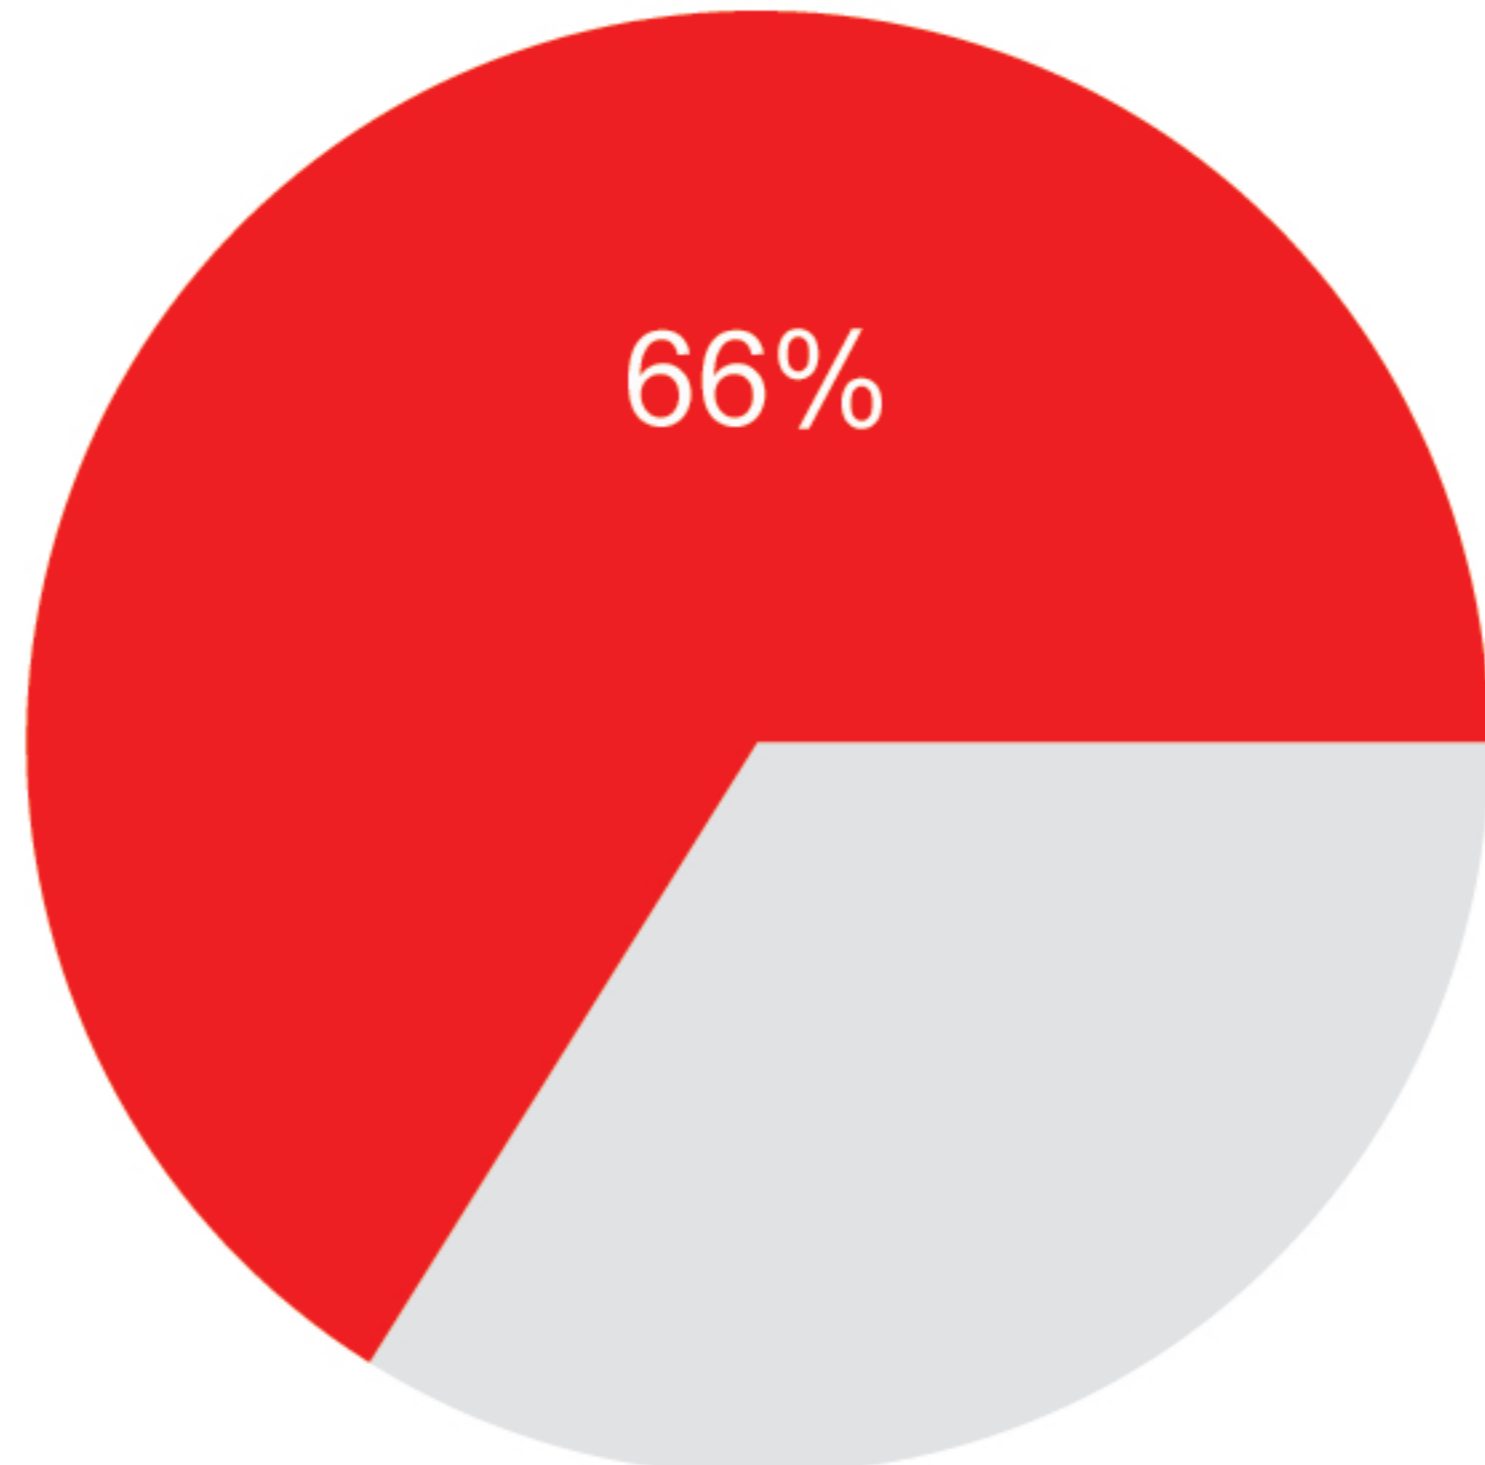

*Prunus (39/59)*

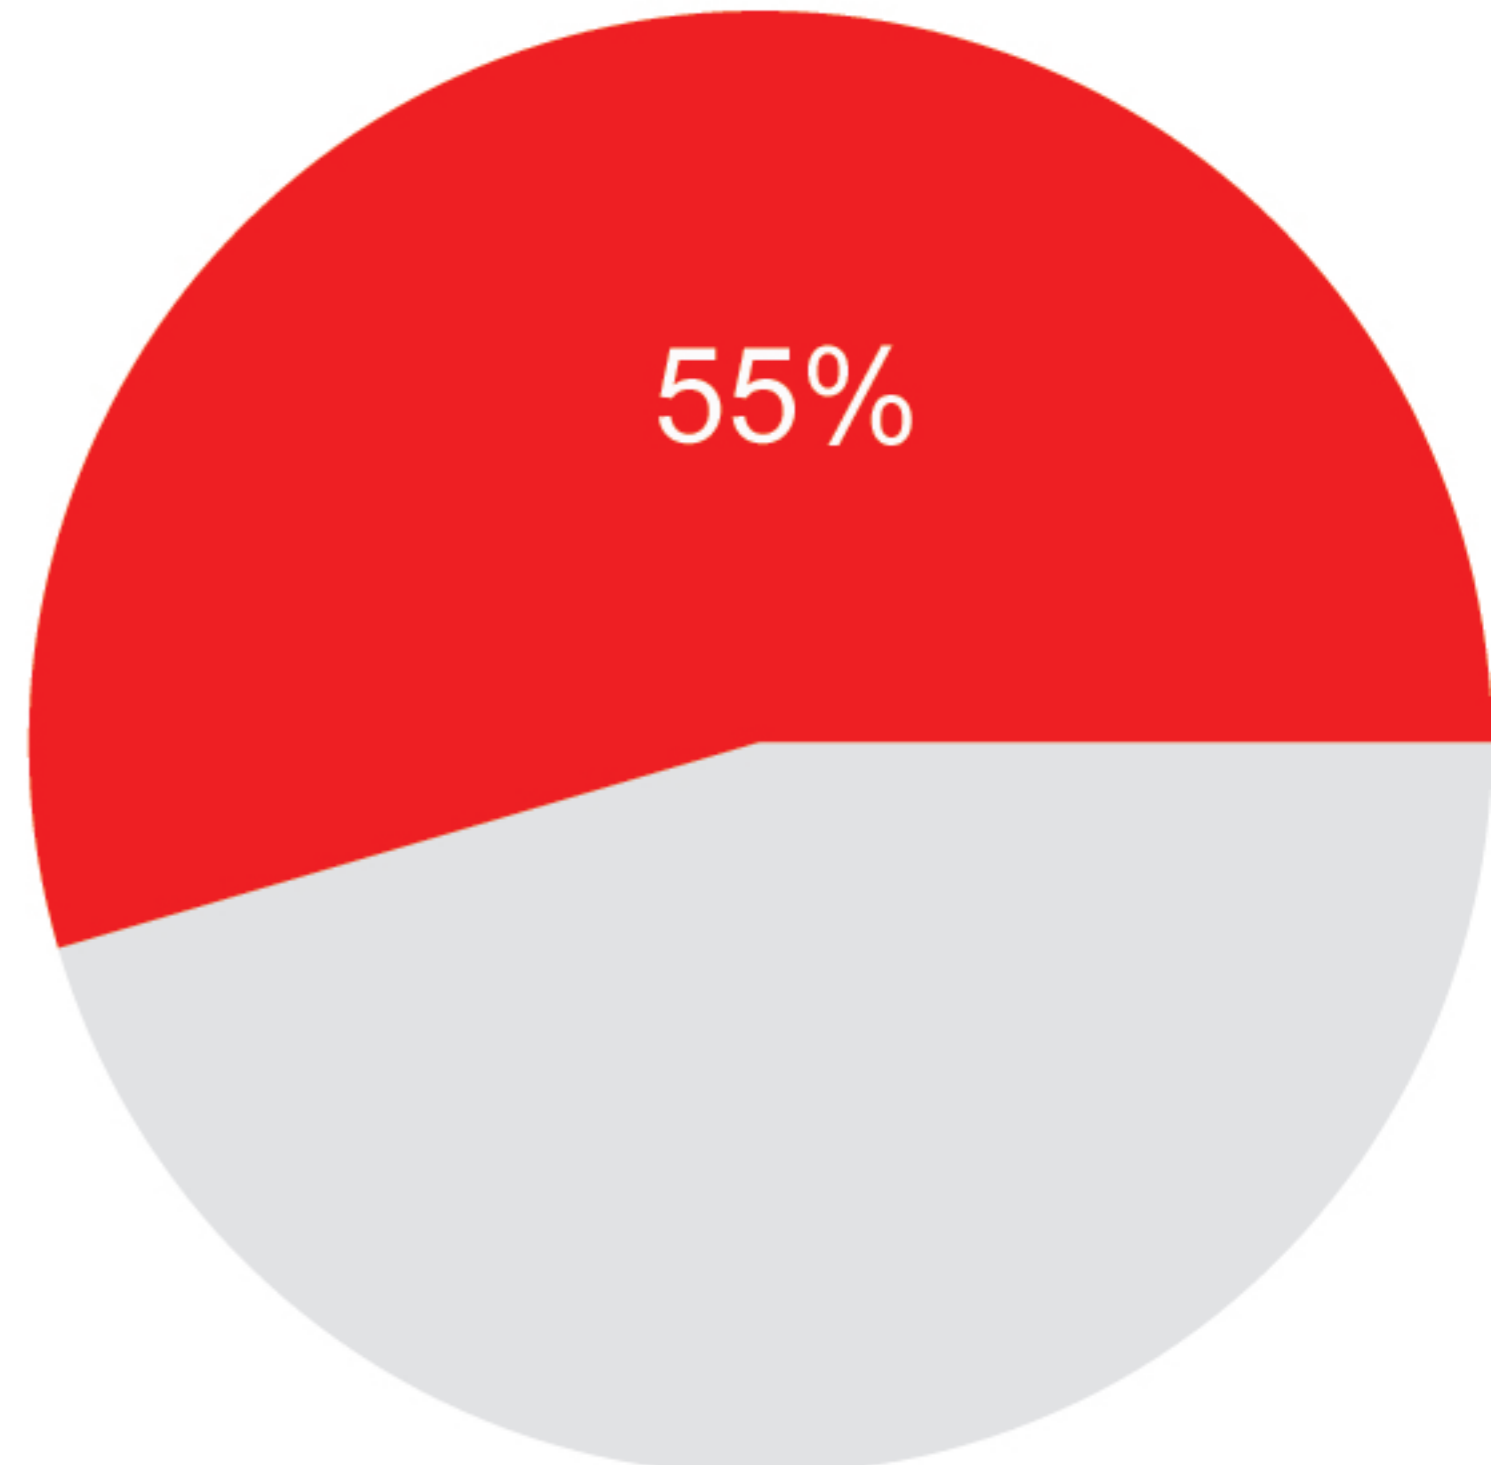

*Pyrus (6/11)*

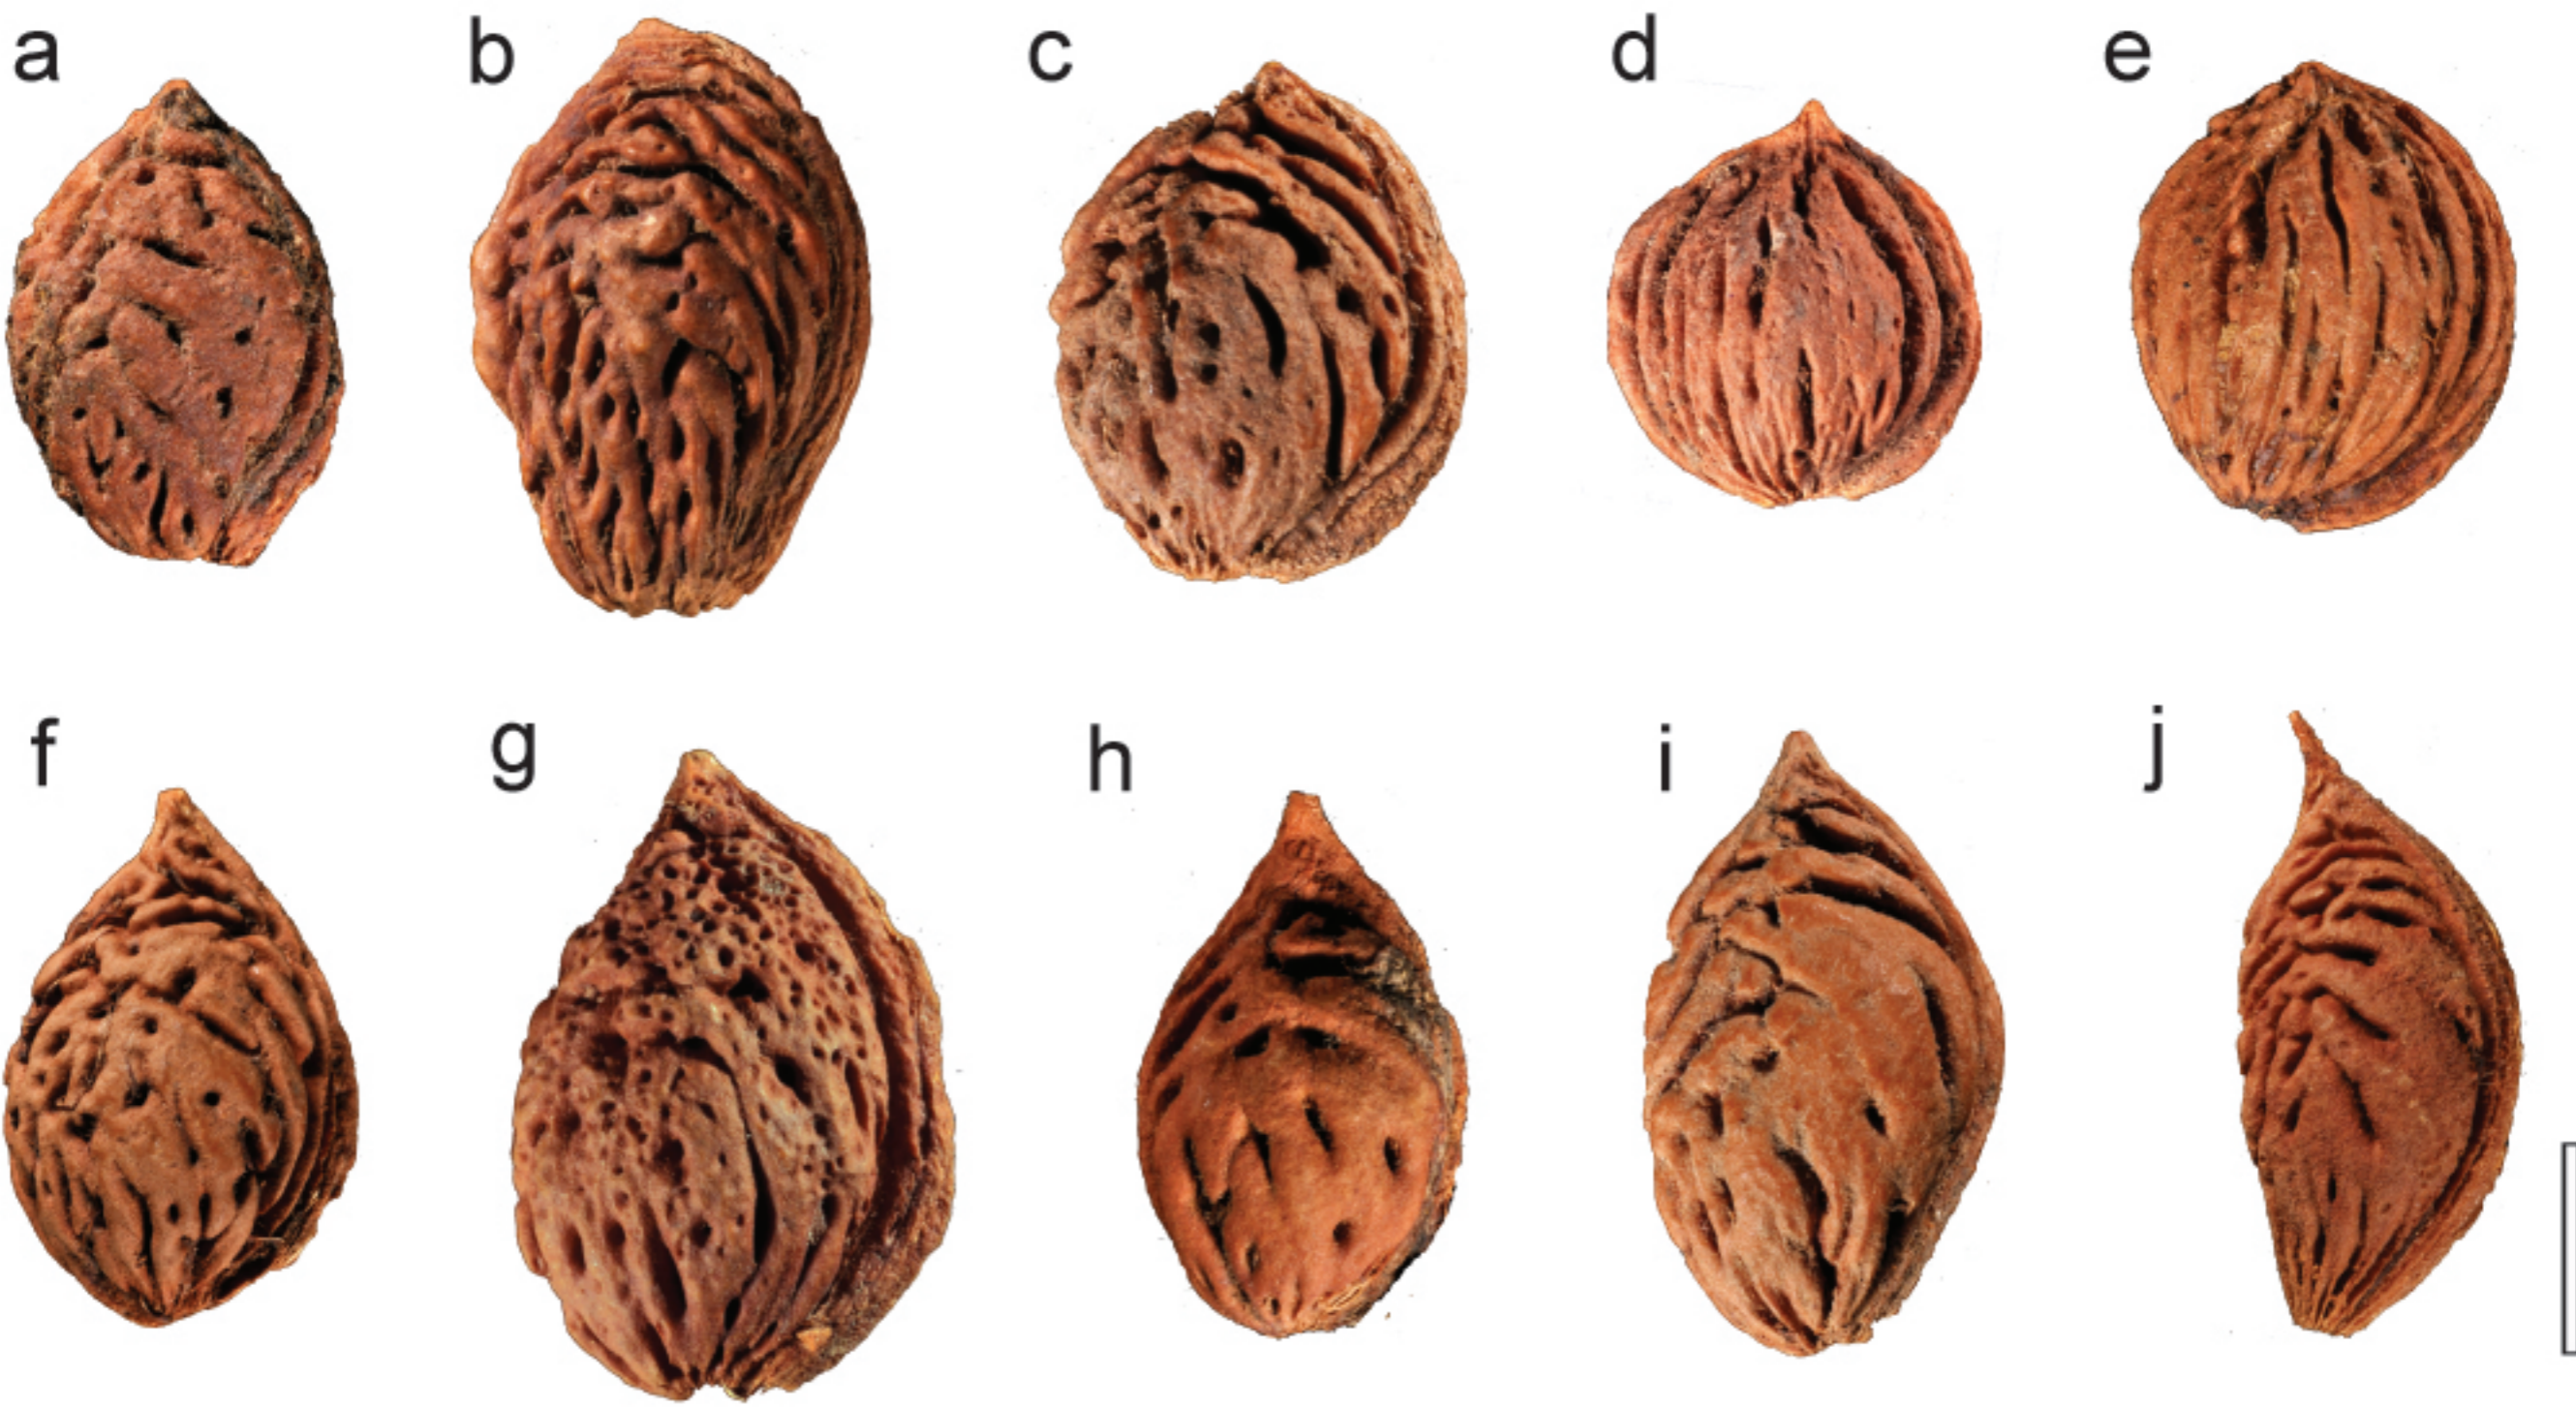

| Species                    | Voucher number                                                  | Shape of endocarp   | Pit (frequency)         | Pit (shape)                 | Basal furrow        | Transverse furrow   | Apex of endocarp                          | Base of endocarp           | Length:Width      | Length                        | Width                         | Groove of vascular bundle canal | Position of vascular bundle canal         |
|----------------------------|-----------------------------------------------------------------|---------------------|-------------------------|-----------------------------|---------------------|---------------------|-------------------------------------------|----------------------------|-------------------|-------------------------------|-------------------------------|---------------------------------|-------------------------------------------|
|                            |                                                                 | Elliptic=0; Round=1 | Absent=0; Few=1; Many=2 | Absent=0; Shallow=1; Deep=2 | Absent=0; Present=1 | Absent=0; Present=1 | Round=0; Acute =1; Acuminate =2; Obtuse=3 | Round=0; Acute=1; Obtuse=2 | <1:1 = 0; ≥1:1 =1 | <1cm = 0; 1cm<2cm =1; ≥2cm =2 | <1cm = 0; 1cm<2cm =1; ≥2cm =2 | Shallow=0; Deep=1               | Not near the margin =0; Near the margin=1 |
| <i>Prunus kummingensis</i> | KUN FC2015001-8                                                 | 0                   | 1                       | 2                           | 1                   | 1                   | 2                                         | 2                          | 1                 | 2                             | 1,2                           | 1                               | 1                                         |
| <i>P. persica</i>          | SPL. 41419; SPL. 41274; SPL. 41398; SPL. 41497; SPL. 41498      | 0                   | 1                       | 2                           | 1                   | 1                   | 2                                         | 2                          | 1                 | 2                             | 1,2                           | 1                               | 1                                         |
| <i>P. africana</i>         | P.I. 116694                                                     | 1                   | 0                       | 0                           | 0                   | 0                   | 0                                         | 0                          | 0                 | 0                             | 0                             | 0                               | 1                                         |
| <i>P. alleghaniensis</i>   | USNHSC 4469                                                     | 0                   | 0                       | 0                           | 0                   | 0                   | 2,3                                       | 1                          | 1                 | 0,1                           | 0                             | 0                               | 0,1                                       |
| <i>P. americana</i>        | USDASH 46231                                                    | 0                   | 0                       | 0                           | 0                   | 0                   | 1,3                                       | 1                          | 1                 | 1                             | 1                             | 1                               | 1                                         |
| <i>P. andersonii</i>       | IP. 6452; SPL. 21657; SPL. 26297; USNHSC 35909                  | 0                   | 2                       | 1                           | 0                   | 0                   | 2                                         | 1                          | 1                 | 1                             | 0,1                           | 1                               | 1                                         |
| <i>P. angustifolia</i>     | Econ. Coll.                                                     | 0                   | 2                       | 1                           | 1                   | 0                   | 1                                         | 2                          | 1                 | 1                             | 0                             | 1                               | 1                                         |
| <i>P. armeniaca</i>        | SPL. 62632                                                      | 1                   | 0                       | 0                           | 1                   | 0                   | 1                                         | 2                          | 0,1               | 1                             | 1                             | 1                               | 0                                         |
| <i>P. avium</i>            | P.I. 126527; P.I. 128826; P.I. 125625; P.I. 124926; SPL. 65127  | 0,1                 | 0                       | 0                           | 0                   | 0                   | 0                                         | 0                          | 1                 | 0                             | 0                             | 0                               | 1                                         |
| <i>P. bokhariensis</i>     | P.I. 137729                                                     | 1                   | 0                       | 0                           | 0                   | 0                   | 3                                         | 2                          | 1                 | 1                             | 0,1                           | 1                               | 0                                         |
| <i>P. bucharica</i>        | PL. 113734; SPL. 30975                                          | 0                   | 0                       | 0                           | 0                   | 0                   | 2                                         | 2                          | 1                 | 2                             | 1                             | 0                               | 0                                         |
| <i>P. buergeriana</i>      | FPL. 81550                                                      | 1                   | 0                       | 0                           | 0                   | 0                   | 1,2                                       | 2                          | 1                 | 0                             | 0                             | 0                               | 1                                         |
| <i>P. cerasifera</i>       | P.I. 125629; P.I. 324007; P.I. 324165; P.I. 324166; P.I. 324008 | 0                   | 0                       | 0                           | 0                   | 0                   | 1,3                                       | 2                          | 1                 | 2                             | 1                             | 0                               | 0                                         |
| <i>P. davidiana</i>        | SPL. 22009; SPL. 47949; SPL. 49409; SPL. 52662; SPL. 52849      | 1                   | 2                       | 2                           | 1                   | 1                   | 3                                         | 2                          | 0,1               | 1,2                           | 1                             | 0                               | 1                                         |
| <i>P. domestica</i>        | P.I. 324011; P.I. 324012                                        | 0                   | 2                       | 1                           | 0                   | 0                   | 1,3                                       | 2                          | 1                 | 1,2                           | 0,1                           | 1                               | 1                                         |
| <i>P. dulcis</i>           | SPL. 28802; SPL. 29214; SPL. 40213; SPL. 50117; SPL. 56177      | 0                   | 1                       | 2                           | 1                   | 0                   | 1,2                                       | 2                          | 1                 | 1,2                           | 1,2                           | 0                               | 1                                         |
| <i>P. fenjiana</i>         | SPL. 27336; SPL. 43302                                          | 0                   | 1                       | 2                           | 0                   | 1                   | 3                                         | 2                          | 1                 | 1                             | 0,1                           | 0                               | 1                                         |
| <i>P. fruticosa</i>        | P.I. 324013                                                     | 0                   | 0                       | 0                           | 1                   | 0                   | 1                                         | 2                          | 1                 | 0                             | 0                             | 0                               | 1                                         |
| <i>P. ilicifolia</i>       | 2019                                                            | 1                   | 0                       | 0                           | 0                   | 0                   | 1                                         | 2                          | 1                 | 1                             | 1                             | 0                               | 1                                         |
| <i>P. kansuensis</i>       | FPL. 100509; SPL. 39428; SPL. 40864; SPL. 68976                 | 1                   | 0                       | 0                           | 1                   | 1                   | 3                                         | 2                          | 1                 | 1                             | 1                             | 1                               | 1                                         |
| <i>P. lycioides</i>        | FPL. 28943; SPL. 28944                                          | 0                   | 0                       | 0                           | 0                   | 0                   | 2                                         | 2                          | 1                 | 1,2                           | 0,1                           | 0                               | 1                                         |
| <i>P. lyonii</i>           | ?                                                               | 1                   | 0                       | 0                           | 0                   | 0                   | 0,1                                       | 1                          | 1                 | 1,2                           | 1                             | 0                               | 1                                         |
| <i>P. mandshurica</i>      | P.I. 324014; P.I. 324016; P.I. 324017;                          | 0                   | 0                       | 0                           | 0                   | 0                   | 1                                         | 1                          | 1                 | 1,2                           | 1                             | 0                               | 0                                         |
| <i>P. mira</i>             | SPL. 34601                                                      | 0                   | 0                       | 0                           | 1                   | 0                   | 1                                         | 1                          | 1                 | 1                             | 1                             | 1                               | 1                                         |
| <i>P. mongolica</i>        | ?                                                               | 1                   | 0                       | 0                           | 1                   | 1                   | 3                                         | 2                          | 1                 | 1                             | 1                             | 1                               | 1                                         |
| <i>P. nume</i>             | SPL. 28685                                                      | 0                   | 2                       | 2                           | 1                   | 0                   | 2                                         | 2                          | 1                 | 2                             | 2                             | 1                               | 0                                         |
| <i>P. padus</i>            | P.I. 317265                                                     | 0                   | 0                       | 0                           | 0                   | 1                   | 0                                         | 2                          | 1                 | 0                             | 0                             | 0                               | 1                                         |
| <i>P. pedunculata</i>      | SPL. 65686                                                      | 0                   | 0                       | 0                           | 1                   | 1                   | 2                                         | 2                          | 1                 | 1                             | 0                             | 1                               | 1                                         |
| <i>P. petunnikowii</i>     | SPL. 73602                                                      | 0                   | 0                       | 0                           | 1                   | 1                   | 2                                         | 1                          | 1                 | 1,2                           | 1                             | 0                               | 1                                         |
| <i>P. phaeosticta</i>      | P.I. 325016                                                     | 1                   | 0                       | 0                           | 0                   | 1                   | 0                                         | 0                          | 1                 | 0                             | 0                             | 0                               | 1                                         |
| <i>P. salicina</i>         | P.I. 324020; SPL. 37006                                         | 0                   | 0                       | 0                           | 0                   | 0                   | 1                                         | 2                          | 1                 | 1                             | 1                             | 1                               | 1                                         |
| <i>P. simonii</i>          | SPL. 39438                                                      | 1                   | 2                       | 2                           | 1                   | 0                   | 0                                         | 2                          | 1                 | 1                             | 1                             | 1                               | 0                                         |
| <i>P. spinosa</i>          | P.I. 324021; PL. 324021                                         | 0                   | 2                       | 1                           | 0                   | 0                   | 1                                         | 2                          | 1                 | 0,1                           | 0                             | 1                               | 1                                         |
| <i>P. tangutica</i>        | SPL. 40010                                                      | 0                   | 0                       | 0                           | 1                   | 1                   | 1,3                                       | 2                          | 0,1               | 1                             | 1                             | 0                               | 1                                         |
| <i>P. tenella</i>          | SPL. 32760                                                      | 0                   | 0                       | 0                           | 1                   | 0                   | 1                                         | 2                          | 1                 | 2                             | 1                             | 0                               | 1                                         |
| <i>P. triloba</i>          | PL. 115091                                                      | 1                   | 2                       | 2                           | 1                   | 1                   | 0                                         | 0                          | 1                 | 1                             | 1                             | 1                               | 1                                         |
| <i>P. webbii</i>           | PL. 108768                                                      | 0                   | 1                       | 2                           | 1                   | 1                   | 1                                         | 2                          | 1                 | 1                             | 1                             | 0                               | 1                                         |



| Cultivar or fossils        | Site                          | Endocarp (cm) |        |         | Fruit (cm) |        |         | Weight (g) |
|----------------------------|-------------------------------|---------------|--------|---------|------------|--------|---------|------------|
|                            |                               | Width         | Length | Average | Width      | Length | Average |            |
| <i>Prunus kunmingensis</i> | Kunming, Yunnan, China        | 2.0           | 2.8    | 2.4     |            |        |         |            |
| Archaeological record      | Kuahuqiao, Zhejiang, China    | 2.0           | 1.6    | 1.8     |            |        |         |            |
| Archaeological record      | Tianluoshan, Zhejiang, China  | 1.9           | 1.5    | 1.7     |            |        |         |            |
| Archaeological record      | Maoshan, Zhejiang, China      | 2.2           | 1.7    | 2.0     |            |        |         |            |
| Archaeological record      | Bianjiashan, Zhejiang, China  | 2.0           | 1.6    | 1.8     |            |        |         |            |
| Archaeological record      | Qianshanyang, Zhejiang, China | 2.6           | 1.9    | 2.3     |            |        |         |            |
| Archaeological record      | Ikiriki, Japan                | 2.2           | 1.8    | 2.0     |            |        |         |            |
| 21 Shi Ji Tao              | Hebei, China                  | 2.8           | 4.3    | 3.6     | 8.3        | 8.1    | 8.2     | 180        |
| C4R2T23                    | USA                           | 3.1           | 4.3    | 3.7     | 8.0        | 7.4    | 7.7     | 208        |
| D2R32T158                  | USA                           | 2.9           | 4.4    | 3.7     | 7.4        | 8.1    | 7.8     | 91         |
| Abehakuto                  | Japan                         | 2.6           | 4.0    | 3.3     | 7.5        | 7.5    | 7.5     | 184        |
| Anlong Bai Tao             | Guizhou, China                | 3.1           | 4.0    | 3.6     | 7.0        | 6.3    | 6.7     | 108        |
| Anlong Shui Mi             | Anhui, China                  | 3.2           | 5.5    | 4.4     | 8.9        | 9.5    | 9.2     | 213        |
| Hakuho                     | Japan                         | 3.1           | 4.1    | 3.6     | 6.7        | 5.8    | 6.3     | 128        |
| Bai He Tao                 | Yungui Plateau, China         | 2.9           | 4.0    | 3.5     | 7.8        | 7.4    | 7.6     | 134        |
| Bai Hua                    | Jiangsu, China                | 3.0           | 4.6    | 3.8     | 7.7        | 7.9    | 7.8     | 155        |
| Bai Li Hu                  | Yunnan, China                 | 3.1           | 4.8    | 4.0     | 6.5        | 6.3    | 6.4     | 123        |
| Bai Nian He                | Yunnan, China                 | 3.3           | 4.9    | 4.1     | 7.3        | 7.3    | 7.3     | 152        |
| Bai Sha                    | Shaanxi, China                | 2.8           | 4.1    | 3.5     | 6.6        | 7.2    | 6.9     | 130        |
| Bai Xiang Lu               | Jiangsu, China                | 3.3           | 4.6    | 4.0     | 7.7        | 8.2    | 8.0     | 120        |
| Snow Princess              | USA                           | 2.0           | 3.4    | 2.7     | 6.3        | 6.6    | 6.5     | 150        |
| Bao Lu                     | Zhejiang, China               | 2.9           | 4.7    | 3.8     | 7.7        | 8.3    | 8.0     | 160        |
| Beijing 11-12              | Beijing, China                | 2.5           | 2.9    | 2.7     | 5.7        | 5.4    | 5.6     | 50         |
| Beijing 21-2               | Beijing, China                | 2.5           | 3.9    | 3.2     | 6.4        | 6.0    | 6.2     | 49         |
| Beijing 76-9-1             | Beijing, China                | 2.7           | 4.0    | 3.4     | 6.8        | 6.6    | 6.7     | 112        |
| Bei Nong 2                 | Beijing, China                | 3.2           | 4.1    | 3.7     | 7.0        | 6.7    | 6.9     | 138        |
| Bei Nong Zao Shu           | Beijing, China                | 2.3           | 3.3    | 2.8     | 5.4        | 5.0    | 5.2     | 50         |
| Nunome Wase                | Japan                         | 3.4           | 4.3    | 3.9     | 6.5        | 7.2    | 6.9     | 130        |
| Kurakato Wase              | Japan                         | 3.1           | 4.5    | 3.8     | 7.6        | 7.4    | 7.5     | 150        |
| Changling Zao Yu Lu        | Zhejiang, China               | 3.0           | 4.5    | 3.8     | 7.8        | 8.2    | 8.0     | 137        |
| Nagasawa Hakuho            | Japan                         | 2.7           | 4.1    | 3.4     | 6.7        | 6.3    | 6.5     | 135        |
| Chi Yuan Mi                | Jiangsu, China                | 3.0           | 5.1    | 4.1     | 7.6        | 7.8    | 7.7     | 180        |
| Hatsukami                  | Japan                         | 3.2           | 4.6    | 3.9     | 7.7        | 7.8    | 7.8     | 150        |
| Kawanakajima Hakuto        | Japan                         | 3.3           | 4.3    | 3.8     | 7.9        | 8.2    | 8.1     | 185        |
| Chun Hua                   | Shanghai, China               | 3.0           | 4.3    | 3.7     | 6.3        | 6.7    | 6.5     | 115        |
| Chun Mi                    | Henan, China                  | 2.5           | 4.4    | 3.5     | 5.7        | 6.2    | 6.0     | 130        |
| Springtime                 | USA                           | 2.8           | 4.3    | 3.6     | 6.6        | 7.2    | 6.9     | 80         |
| Da Guo Hei Tao             | Shandong, China               | 2.7           | 3.8    | 3.3     | 6.5        | 6.5    | 6.5     | 146        |
| Da Hong Pao                | Hubei, China                  | 2.6           | 4.1    | 3.4     | 6.4        | 6.8    | 6.6     | 108        |
| Da Hong Tao                | Shanxi, China                 | 2.8           | 4.2    | 3.5     | 7.8        | 7.6    | 7.7     | 219        |
| Okubo                      | Japan                         | 2.7           | 4.1    | 3.4     | 7.5        | 7.1    | 7.3     | 159        |
| Da Tian Tao                | Jiangsu, China                | 2.6           | 4.2    | 3.4     | 6.7        | 7.6    | 7.2     | 158        |
| Da Xue Tao                 | Hebei, China                  | 3.2           | 5.2    | 4.2     | 9.4        | 10.0   | 9.7     | 126        |
| Diao Zhi Bai               | Anhui, China                  | 3.0           | 4.5    | 3.8     | 7.1        | 7.8    | 7.5     | 130        |
| Toobo                      | Japan                         | 2.5           | 3.6    | 3.1     | 6.5        | 5.8    | 6.2     | 83         |
| Azumo                      | Japan                         | 3.4           | 4.8    | 4.1     | 7.0        | 6.9    | 7.0     | 100        |
| Dunhuang Dong Tao          | Gansu, China                  | 3.0           | 3.9    | 3.5     | 7.1        | 6.2    | 6.7     | 104        |
| Er Jie Bai                 | Henan, China                  | 3.4           | 4.6    | 4.0     | 7.2        | 7.4    | 7.3     | 157        |
| Er Zao Tao                 | Yunnan, China                 | 2.3           | 3.9    | 3.1     | 6.2        | 6.1    | 6.2     | 93         |
| Feicheng Bai Li 10         | Shandong, China               | 3.0           | 4.8    | 3.9     | 7.2        | 7.2    | 7.2     | 191        |
| Feicheng Bai Li 17         | Shandong, China               | 3.3           | 4.9    | 4.1     | 8.2        | 8.3    | 8.3     | 258        |
| Feicheng Hong Li 6         | Shandong, China               | 3.2           | 4.9    | 4.1     | 9.4        | 8.4    | 8.9     | 221        |
| Feng Bai                   | Liaoning, China               | 2.9           | 4.6    | 3.8     | 8.1        | 8.2    | 8.2     | 246        |
| Feng Lu                    | Shanghai, China               | 2.8           | 4.6    | 3.7     | 7.8        | 7.3    | 7.6     | 115        |
| Gan Xuan 4                 | Gansu, China                  | 2.7           | 4.2    | 3.5     | 7.0        | 7.0    | 7.0     | 102        |
| Okayama 3                  | Japan                         | 2.5           | 3.8    | 3.2     | 6.7        | 7.4    | 7.1     | 130        |
| Okayama 500                | Japan                         | 2.8           | 4.6    | 3.7     | 6.5        | 7.1    | 6.8     | 108        |
| Hakuto                     | Japan                         | 3.5           | 5.3    | 4.4     | 7.3        | 7.1    | 7.2     | 135        |
| Okayama Wase               | Japan                         | 2.8           | 4.8    | 3.8     | 7.7        | 8.0    | 7.9     | 142        |
| Gaotai 1                   | Gansu, China                  | 3.1           | 4.6    | 3.9     | 7.4        | 7.7    | 7.6     | 133        |
| Kouyou Hakuto              | Japan                         | 3.1           | 5.1    | 4.1     | 7.1        | 8.2    | 7.7     | 144        |
| Ge Gu                      | Hebei, China                  | 3.9           | 5.6    | 4.8     | 9.8        | 9.6    | 9.7     | 118        |
| Guizhou Shui Mi            | Guizhou, China                | 2.8           | 4.1    | 3.5     | 7.6        | 6.9    | 7.3     | 140        |
| Han Lu Mi                  | Shandong, China               | 2.8           | 4.3    | 3.6     | 7.6        | 8.6    | 8.1     | 150        |
| Hang Yu                    | Zhejiang, China               | 2.8           | 4.2    | 3.5     | 6.8        | 6.6    | 6.7     | 130        |
| Hei Bu Dai                 | Henan, China                  | 2.3           | 3.7    | 3.0     | 5.7        | 5.9    | 5.8     | 123        |
| Hong Gan Lu                | Liaoning, China               | 4.4           | 3.0    | 3.7     | 8.0        | 6.4    | 7.2     | 103        |
| Hong Mei 2                 | Zhejiang, China               | 3.0           | 4.4    | 3.7     | 7.4        | 7.1    | 7.3     | 155        |
| Hong Tao                   | Beijing, China                | 3.0           | 4.7    | 3.9     | 7.8        | 8.2    | 8.0     | 147        |
| Hong Ya Zui                | Hebei, China                  | 2.6           | 3.9    | 3.3     | 6.6        | 7.2    | 6.9     | 104        |

|                         |                  |     |     |     |     |     |     |     |
|-------------------------|------------------|-----|-----|-----|-----|-----|-----|-----|
| Huichun Tao             | Jilin, China     | 2.6 | 3.5 | 3.1 | 5.3 | 5.0 | 5.2 | 94  |
| Huo Zhu                 | Jiangsu, China   | 2.3 | 3.6 | 3.0 | 5.9 | 6.5 | 6.2 | 117 |
| Ji Zui Bai              | Henan, China     | 3.0 | 4.6 | 3.8 | 8.0 | 8.5 | 8.3 | 145 |
| Jilin 8501              | Jilin, China     | 2.0 | 2.9 | 2.5 | 5.3 | 5.4 | 5.4 | 68  |
| Jilin 8601              | Jilin, China     | 2.1 | 2.9 | 2.5 | 4.8 | 5.6 | 5.2 | 50  |
| Jilin 8701              | Jilin, China     | 2.4 | 3.1 | 2.8 | 5.8 | 5.7 | 5.8 | 70  |
| Jilin 8801              | Jilin, China     | 1.9 | 2.7 | 2.3 | 4.8 | 5.1 | 5.0 | 46  |
| Jian Zui Hong Rou       | Henan, China     | 2.3 | 3.6 | 3.0 | 5.9 | 6.5 | 6.2 | 132 |
| Jie Tu Bai              | Heibei, China    | 3.0 | 4.4 | 3.7 | 8.4 | 8.4 | 8.4 | 220 |
| Jingmen Tao             | Hubei, China     | 2.5 | 3.5 | 3.0 | 6.7 | 6.5 | 6.6 | 108 |
| Jiuyang Qing Tao        | Guizhou, China   | 2.7 | 4.3 | 3.5 | 6.8 | 6.9 | 6.9 | 80  |
| Kashi 4                 | Xinjiang, China  | 2.8 | 4.0 | 3.4 | 6.5 | 6.9 | 6.7 | 112 |
| Laishan Mi              | Shandong, China  | 2.8 | 4.4 | 3.6 | 7.2 | 8.0 | 7.6 | 193 |
| Li He Tian Ren          | Xinjiang, China  | 2.7 | 4.1 | 3.4 | 6.3 | 6.3 | 6.3 | 111 |
| Lin Bai 3               | Gansu, China     | 2.5 | 3.7 | 3.1 | 5.7 | 6.5 | 6.1 | 50  |
| Lin Bai 10              | Gansu, China     | 2.7 | 3.9 | 3.3 | 6.9 | 6.4 | 6.7 | 81  |
| Liu Yue Bai             | Heibei, China    | 3.0 | 4.3 | 3.7 | 7.5 | 8.0 | 7.8 | 114 |
| Liu Yue Kong            | Heinan, China    | 3.0 | 4.5 | 3.8 | 6.4 | 6.8 | 6.6 | 117 |
| Robin                   | USA              | 2.6 | 3.9 | 3.3 | 6.9 | 6.8 | 6.9 | 92  |
| Lulin Shui Mi           | Jiangsu, China   | 2.7 | 4.0 | 3.4 | 7.2 | 7.5 | 7.4 | 131 |
| Mi Yang Shan            | Xinjiang, China  | 2.6 | 3.2 | 2.9 | 6.2 | 6.0 | 6.1 | 99  |
| Nan Shan Tian Tao       | Guangdong, China | 2.3 | 3.6 | 3.0 | 6.3 | 6.6 | 6.5 | 100 |
| Ping Bei Zi             | Jiangsu, China   | 2.7 | 4.0 | 3.4 | 6.2 | 6.4 | 6.3 | 91  |
| Pingyong Tao            | Guizhou, China   | 2.1 | 2.8 | 2.5 | 5.4 | 5.4 | 5.4 | 73  |
| Qi Zui Hong Rou         | Henan, China     | 2.3 | 3.4 | 2.9 | 6.4 | 6.3 | 6.4 | 113 |
| Qingling Dong Tao       | Shaanxi, China   | 2.3 | 3.1 | 2.7 | 6.0 | 5.6 | 5.8 | 53  |
| Qing Mao Zi Bai Hua     | Sichuan, China   | 3.0 | 4.0 | 3.5 | 7.2 | 8.0 | 7.6 | 143 |
| Qing Tao                | Guizhou, China   | 2.8 | 4.7 | 3.8 | 7.7 | 8.6 | 8.2 | 160 |
| Qingzhou Bai Pi Mi Tao  | Shandong, China  | 1.9 | 3.0 | 2.5 | 5.2 | 5.9 | 5.6 | 46  |
| Qingzhou Hong Pi Mi Tao | Shandong, China  | 2.1 | 2.9 | 2.5 | 5.8 | 5.2 | 5.5 | 52  |
| Qiu Mi Shi Sheng        | Shaanxi, China   | 2.9 | 4.2 | 3.6 | 8.2 | 7.5 | 7.9 | 222 |
| Shenzhou Li He Shui Mi  | Hebei, China     | 2.8 | 4.5 | 3.7 | 7.2 | 8.2 | 7.7 | 131 |
| Shenzhou Shui Mi        | Hebei, China     | 2.7 | 4.4 | 3.6 | 7.5 | 8.7 | 8.1 | 225 |
| Shi Tou Tao             | Henan, China     | 2.5 | 3.4 | 3.0 | 6.9 | 6.9 | 6.9 | 136 |
| Shi Yu Bai Tao          | Hebei, China     | 2.7 | 4.1 | 3.4 | 8.4 | 8.4 | 8.4 | 170 |
| Tai Nong 2              | Taiwan, China    | 2.1 | 3.1 | 2.6 | 6.5 | 6.0 | 6.3 | 78  |
| Tianjin Shui Mi         | Tianjin, China   | 2.6 | 4.1 | 3.4 | 7.2 | 8.5 | 7.9 | 100 |
| Wanzhou Suan Tao        | Chongqing, China | 2.8 | 5.1 | 4.0 | 7.5 | 8.4 | 8.0 | 150 |
| Wangmo Xiao Mi Tao      | Guizhou, China   | 2.5 | 3.9 | 3.2 | 6.8 | 6.9 | 6.9 | 81  |
| Wei Jian Hong Rou       | Henan, China     | 2.4 | 4.0 | 3.2 | 5.8 | 6.6 | 6.2 | 127 |
| Wu Da Tao               | Guizhou, China   | 2.1 | 2.7 | 2.4 | 5.7 | 5.3 | 5.5 | 49  |
| Wu Yue Xian             | Beijing, China   | 2.7 | 4.3 | 3.5 | 7.5 | 8.0 | 7.8 | 112 |
| Wuhan 2                 | Hebei, China     | 2.7 | 4.0 | 3.4 | 6.4 | 6.7 | 6.6 | 90  |
| Xi Jiao 1               | Shaanxi, China   | 3.1 | 4.3 | 3.7 | 7.2 | 7.7 | 7.5 | 135 |
| Xi Mei 1                | Shaanxi, China   | 2.5 | 4.3 | 3.4 | 6.3 | 6.5 | 6.4 | 112 |
| Xi Mei 2                | Shaanxi, China   | 2.7 | 4.2 | 3.5 | 7.6 | 7.1 | 7.4 | 100 |
| Xi Nong 14-3            | Shaanxi, China   | 2.7 | 4.5 | 3.6 | 7.0 | 7.8 | 7.4 | 150 |
| Xi Nong 18              | Shaanxi, China   | 2.9 | 4.6 | 3.8 | 8.5 | 8.1 | 8.3 | 154 |
| Xi Nong 19              | Shaanxi, China   | 2.6 | 3.6 | 3.1 | 7.0 | 6.4 | 6.7 | 100 |
| Xiang Tao               | Liaoning, China  | 2.6 | 3.3 | 3.0 | 7.0 | 7.0 | 7.0 | 136 |
| Xingyi Bai Hua Tao      | Guizhou, China   | 2.6 | 3.9 | 3.3 | 6.6 | 6.9 | 6.8 | 99  |
| Yexian Dong Tao         | Henan, China     | 2.2 | 2.9 | 2.6 | 5.6 | 5.7 | 5.7 | 55  |
| Yi Xian Hong            | Hebei, China     | 2.6 | 4.6 | 3.6 | 6.9 | 8.2 | 7.6 | 150 |
| Ying Xue                | Beijing, China   | 2.9 | 4.0 | 3.5 | 6.6 | 6.6 | 6.6 | 130 |
| Yumyeong                | Korea            | 3.0 | 4.5 | 3.8 | 7.3 | 7.2 | 7.3 | 190 |
| Yu Hua Lu               | Jiangsu, China   | 3.0 | 4.6 | 3.8 | 7.6 | 7.5 | 7.6 | 110 |
| Yu Bai                  | Henan, China     | 2.7 | 4.4 | 3.6 | 6.7 | 7.3 | 7.0 | 130 |
| Yu Tian                 | Henan, China     | 3.4 | 4.6 | 4.0 | 8.3 | 8.2 | 8.3 | 209 |
| Yun Shu 2               | Zhejiang, China  | 2.8 | 3.6 | 3.2 | 7.5 | 7.2 | 7.4 | 144 |
| Zao Jiu Bao             | Shanxi, China    | 3.0 | 4.7 | 3.9 | 7.2 | 7.3 | 7.3 | 115 |
| Zao Xiang Yu            | Beijing, China   | 2.3 | 3.8 | 3.1 | 6.0 | 6.2 | 6.1 | 123 |
| Zao Yu                  | Beijing, China   | 2.1 | 3.0 | 2.6 | 6.5 | 7.7 | 7.1 | 260 |
| Zhang Bai 2             | Gansu, China     | 2.7 | 3.7 | 3.2 | 6.3 | 5.8 | 6.1 | 134 |
| Zhang Bai 5             | Gansu, China     | 2.8 | 4.5 | 3.7 | 7.7 | 7.2 | 7.5 | 125 |
| Zheng Bai 5-2           | Henan, China     | 2.5 | 3.7 | 3.1 | 6.7 | 7.5 | 7.1 | 112 |
| Zheng Bai 5-38          | Henan, China     | 3.0 | 4.0 | 3.5 | 7.1 | 6.6 | 6.9 | 250 |
| Zhong Hua Shou Tao      | Shandong, China  | 2.5 | 4.1 | 3.3 | 9.0 | 9.7 | 9.4 | 350 |
| FAL16-33MR              | USA              | 3.3 | 3.8 | 3.6 | 7.6 | 6.9 | 7.3 | 127 |
| NJC77                   | USA              | 2.8 | 3.7 | 3.3 | 7.5 | 6.5 | 7.0 | 112 |
| NJC112                  | USA              | 3.1 | 4.5 | 3.8 | 7.4 | 7.8 | 7.6 | 106 |
| Elberta                 | USA              | 3.1 | 4.7 | 3.9 | 8.4 | 8.6 | 8.5 | 170 |
| Cheng Xiang             | Liaoning, China  | 2.3 | 3.3 | 2.8 | 6.8 | 7.1 | 7.0 | 95  |

|                        |                 |     |     |     |     |     |     |     |
|------------------------|-----------------|-----|-----|-----|-----|-----|-----|-----|
| Spring Gem             | USA             | 2.8 | 3.8 | 3.3 | 7.1 | 7.3 | 7.2 | 105 |
| Springgold             | USA             | 2.0 | 2.8 | 2.4 | 4.9 | 5.2 | 5.1 | 74  |
| Da Jin Dan             | Yunnan, China   | 3.2 | 4.3 | 3.8 | 7.3 | 6.6 | 7.0 | 136 |
| Da Li He Huang Rou     | Xinjiang, China | 3.0 | 3.9 | 3.5 | 6.5 | 6.2 | 6.4 | 108 |
| Dalian 22-6            | Liaoning, China | 2.4 | 3.0 | 2.7 | 6.4 | 6.2 | 6.3 | 105 |
| Dalian 22-8            | Liaoning, China | 3.1 | 4.4 | 3.8 | 8.1 | 8.2 | 8.2 | 181 |
| Dawangzhuang Huang Tao | Henan, China    | 2.8 | 4.5 | 3.7 | 6.9 | 7.0 | 7.0 | 125 |
| Da Zhao Huang Tao      | Henan, China    | 3.0 | 4.2 | 3.6 | 7.7 | 7.3 | 7.5 | 121 |
| Dicon                  | USA             | 2.6 | 4.2 | 3.4 | 7.7 | 8.1 | 7.9 | 162 |
| Favolate 2             | Italy           | 2.9 | 4.0 | 3.5 | 6.8 | 6.0 | 6.4 | 82  |
| Favolate 3             | Italy           | 2.7 | 4.0 | 3.4 | 6.8 | 6.9 | 6.9 | 88  |
| Fay Elberta            | USA             | 2.5 | 4.1 | 3.3 | 7.7 | 7.5 | 7.6 | 153 |
| Phillips               | USA             | 3.1 | 3.8 | 3.5 | 7.8 | 7.5 | 7.7 | 126 |
| Feng Guan 2            | Zhejiang, China | 3.6 | 4.9 | 4.3 | 8.5 | 7.9 | 8.2 | 118 |
| Fertilia Morettini     | Italy           | 2.6 | 4.3 | 3.5 | 7.5 | 8.0 | 7.8 | 115 |
| Fortuna                | USA             | 1.1 | 3.7 | 2.4 | 6.8 | 6.2 | 6.5 | 91  |
| Frederica              | USA             | 2.7 | 3.7 | 3.2 | 7.3 | 6.0 | 6.7 | 130 |
| Flordacrest            | USA             | 2.7 | 3.6 | 3.2 | 7.4 | 6.9 | 7.2 | 120 |
| Flordagold             | USA             | 2.8 | 4.2 | 3.5 | 7.6 | 8.0 | 7.8 | 119 |
| Gala                   | USA             | 3.0 | 4.5 | 3.8 | 7.5 | 7.7 | 7.6 | 138 |
| Gan Xuan 2             | Gansu, China    | 3.1 | 4.8 | 4.0 | 7.4 | 7.7 | 7.6 | 189 |
| Gua Tao                | Guangxi, China  | 2.1 | 3.6 | 2.9 | 6.5 | 6.4 | 6.5 | 101 |
| Kanto 14               | Japan           | 3.7 | 3.7 | 3.7 | 7.6 | 7.1 | 7.4 | 188 |
| Blazeprince            | USA             | 2.6 | 3.5 | 3.1 | 7.2 | 6.2 | 6.7 | 126 |
| Flameprince            | USA             | 2.9 | 4.6 | 3.8 | 8.4 | 8.4 | 8.4 | 206 |
| Guizhou Huang Jin Mi   | Guizhou, China  | 2.6 | 3.6 | 3.1 | 7.5 | 7.3 | 7.4 | 143 |
| Harbrite               | Canada          | 2.4 | 4.1 | 3.3 | 6.8 | 7.6 | 7.2 | 120 |
| Harken                 | Canada          | 2.3 | 3.4 | 2.9 | 7.6 | 7.1 | 7.4 | 160 |
| Havis                  | USA             | 3.0 | 4.3 | 3.7 | 9.1 | 8.5 | 8.8 | 211 |
| Hanthorne              | USA             | 3.4 | 4.9 | 4.2 | 8.6 | 7.6 | 8.1 | 212 |
| Hetian Huang Rou       | Xinjiang, China | 2.5 | 3.1 | 2.8 | 6.2 | 5.6 | 5.9 | 70  |
| Harmony                | USA             | 3.3 | 5.3 | 4.3 | 8.3 | 8.1 | 8.2 | 155 |
| Redtop                 | USA             | 2.4 | 3.9 | 3.2 | 7.6 | 7.4 | 7.5 | 133 |
| Redskin                | USA             | 2.6 | 3.8 | 3.2 | 7.9 | 6.9 | 7.4 | 143 |
| Huang La Tao           | Guangxi, China  | 2.9 | 4.0 | 3.5 | 6.4 | 6.9 | 6.7 | 142 |
| Huang Yan              | Yunnan, China   | 2.9 | 4.3 | 3.6 | 7.0 | 7.1 | 7.1 | 123 |
| Jiangcun 4             | Gansu, China    | 3.0 | 3.6 | 3.3 | 7.3 | 6.7 | 7.0 | 151 |
| Jiangcun 5             | Gansu, China    | 3.2 | 4.2 | 3.7 | 8.0 | 9.0 | 8.5 | 159 |
| Jin Lu                 | Liaoning, China | 2.9 | 4.8 | 3.9 | 7.2 | 6.8 | 7.0 | 144 |
| Marigold               | USA             | 2.6 | 3.7 | 3.2 | 6.5 | 6.0 | 6.3 | 88  |
| Jin Shi Ji             | Hebei, China    | 2.8 | 3.9 | 3.4 | 7.7 | 7.9 | 7.8 | 300 |
| Babygold 6             | USA             | 2.8 | 4.0 | 3.4 | 8.0 | 7.2 | 7.6 | 144 |
| Babaygold 7            | USA             | 2.8 | 4.2 | 3.5 | 8.0 | 7.8 | 7.9 | 156 |
| Dwarf Norman           | USA             | 2.4 | 4.5 | 3.5 | 7.7 | 8.2 | 8.0 | 193 |
| Cullinan               | USA             | 2.7 | 4.2 | 3.5 | 7.7 | 6.9 | 7.3 | 200 |
| Lafeliciana            | USA             | 2.6 | 3.7 | 3.2 | 6.5 | 6.0 | 6.3 | 106 |
| Lian Huang             | Liaoning, China | 2.5 | 4.7 | 3.6 | 7.7 | 7.7 | 7.7 | 165 |
| Long 1-2-6             | Gansu, China    | 2.9 | 4.8 | 3.9 | 6.8 | 7.5 | 7.2 | 136 |
| Long 2-4-6             | Gansu, China    | 2.9 | 3.7 | 3.3 | 6.5 | 6.7 | 6.6 | 128 |
| Norman                 | USA             | 2.7 | 4.3 | 3.5 | 7.7 | 7.3 | 7.5 | 139 |
| Rumiana                | 保加利亚            | 3.5 | 4.3 | 3.9 | 8.5 | 8.2 | 8.4 | 180 |
| McNeely                | USA             | 2.7 | 4.4 | 3.6 | 8.0 | 7.8 | 7.9 | 200 |
| Mei Jin                | Hebei, China    | 2.0 | 3.5 | 2.8 | 7.0 | 7.2 | 7.1 | 150 |
| Myojo                  | Japan           | 3.0 | 4.3 | 3.7 | 7.6 | 7.8 | 7.7 | 166 |
| Moyu 8                 | Xinjiang, China | 2.4 | 3.5 | 3.0 | 5.7 | 5.8 | 5.8 | 91  |
| Rio Oso Gem            | USA             | 2.5 | 4.3 | 3.4 | 7.5 | 7.5 | 7.5 | 114 |
| Regina                 | USA             | 2.7 | 4.3 | 3.5 | 6.7 | 7.0 | 6.9 | 130 |
| Qing Si                | Yunnan, China   | 2.7 | 4.1 | 3.4 | 7.0 | 6.2 | 6.6 | 126 |
| Autumn Prince          | USA             | 2.8 | 4.0 | 3.4 | 7.8 | 7.3 | 7.6 | 142 |
| Tropicbeauty           | USA             | 2.4 | 3.3 | 2.9 | 6.4 | 5.7 | 6.1 | 95  |
| Texroyal               | USA             | 2.7 | 3.4 | 3.1 | 7.5 | 6.7 | 7.1 | 108 |
| Texstar                | USA             | 3.0 | 3.9 | 3.5 | 7.6 | 6.9 | 7.3 | 104 |
| Tugou 1                | Gansu, China    | 2.3 | 3.3 | 2.8 | 5.5 | 5.4 | 5.5 | 92  |
| Wan Huang Jin          | Japan           | 3.3 | 4.6 | 4.0 | 8.3 | 8.9 | 8.6 | 186 |
| Flavorcrest            | USA             | 2.1 | 3.2 | 2.7 | 6.6 | 6.5 | 6.6 | 142 |
| Gold                   | Japan           | 2.6 | 4.1 | 3.4 | 7.9 | 8.5 | 8.2 | 208 |
| Xiang Jiao Tao         | Liaoning, China | 2.9 | 4.1 | 3.5 | 6.9 | 7.2 | 7.1 | 117 |
| Zao Huang Huan         | Shaanxi, China  | 2.8 | 4.8 | 3.8 | 7.2 | 7.8 | 7.5 | 122 |
| Improved Flavor Crest  | USA             | 2.5 | 3.5 | 3.0 | 6.1 | 6.1 | 6.1 | 150 |
| Zheng Huang 15-1       | Henan, China    | 2.8 | 4.5 | 3.7 | 7.2 | 7.2 | 7.2 | 132 |
| Zheng Huang 4          | Henan, China    | 3.4 | 5.2 | 4.3 | 9.4 | 9.0 | 9.2 | 222 |
| NJN69                  | USA             | 2.9 | 4.1 | 3.5 | 6.9 | 6.6 | 6.8 | 115 |

|                          |                 |     |     |     |     |     |     |     |
|--------------------------|-----------------|-----|-----|-----|-----|-----|-----|-----|
| NJN70                    | USA             | 2.5 | 4.1 | 3.3 | 5.8 | 5.9 | 5.9 | 108 |
| NJN76                    | USA             | 3.1 | 4.0 | 3.6 | 7.1 | 6.9 | 7.0 | 130 |
| NJN89                    | USA             | 2.6 | 4.1 | 3.4 | 6.8 | 6.0 | 6.4 | 108 |
| NJN93                    | USA             | 3.1 | 4.6 | 3.9 | 8.3 | 7.8 | 8.1 | 112 |
| Maria Emilia             | Italy           | 2.5 | 4.3 | 3.4 | 6.1 | 6.5 | 6.3 | 93  |
| Anderson                 | Italy           | 2.6 | 4.2 | 3.4 | 6.8 | 6.6 | 6.7 | 95  |
| Bulgaria 2               | 保加利亚            | 2.7 | 4.3 | 3.5 | 6.6 | 6.4 | 6.5 | 110 |
| Arctic Queen             | USA             | 2.7 | 3.5 | 3.1 | 6.8 | 6.7 | 6.8 | 157 |
| Arctic Rose              | USA             | 2.5 | 3.7 | 3.1 | 6.9 | 6.3 | 6.6 | 130 |
| Arctic Star              | USA             | 2.6 | 3.4 | 3.0 | 6.6 | 6.2 | 6.4 | 137 |
| Troubadour               | France          | 2.7 | 3.7 | 3.2 | 6.9 | 6.3 | 6.6 | 120 |
| Super Crimson            | USA             | 2.3 | 3.3 | 2.8 | 5.9 | 5.4 | 5.7 | 76  |
| Dalian 60-14-111         | Liaoning, China | 3.0 | 4.7 | 3.9 | 7.0 | 7.0 | 7.0 | 95  |
| Croce Decsus             | USA             | 3.0 | 5.0 | 4.0 | 6.6 | 7.1 | 6.9 | 83  |
| Fairlane                 | USA             | 3.1 | 4.6 | 3.9 | 7.1 | 6.8 | 7.0 | 139 |
| Fuzador                  | France          | 2.4 | 3.5 | 3.0 | 6.5 | 6.2 | 6.4 | 94  |
| Fuzalode                 | France          | 2.6 | 3.3 | 3.0 | 6.9 | 6.0 | 6.5 | 88  |
| Nectagrand 2             | Italy           | 2.3 | 3.8 | 3.1 | 6.4 | 6.1 | 6.3 | 85  |
| Nectagrand 7             | Italy           | 2.8 | 4.4 | 3.6 | 7.3 | 7.4 | 7.4 | 113 |
| Sunraycer                | USA             | 2.4 | 3.3 | 2.9 | 6.7 | 6.4 | 6.6 | 85  |
| Harko                    | USA             | 2.4 | 3.6 | 3.0 | 5.8 | 5.1 | 5.5 | 80  |
| Hardired                 | USA             | 3.0 | 4.5 | 3.8 | 8.4 | 8.2 | 8.3 | 128 |
| Heyang You Tao           | Shaanxi, China  | 2.9 | 3.9 | 3.4 | 7.0 | 6.6 | 6.8 | 104 |
| Red Diamond              | USA             | 2.6 | 3.8 | 3.2 | 6.3 | 5.9 | 6.1 | 94  |
| Redgold                  | USA             | 2.6 | 3.8 | 3.2 | 6.8 | 7.0 | 6.9 | 148 |
| Sunred                   | USA             | 2.0 | 2.8 | 2.4 | 5.3 | 5.3 | 5.3 | 60  |
| Hong Shan Hu             | Beijing, China  | 2.8 | 4.0 | 3.4 | 7.1 | 6.5 | 6.8 | 151 |
| Nactared 4               | USA             | 2.4 | 3.7 | 3.1 | 6.0 | 5.7 | 5.9 | 79  |
| NJN26                    | USA             | 2.6 | 4.1 | 3.4 | 6.7 | 6.4 | 6.6 | 85  |
| Hu You 004               | Shanghai, China | 2.6 | 3.9 | 3.3 | 6.5 | 6.9 | 6.7 | 127 |
| Imoiouniku               | Japan           | 2.4 | 3.4 | 2.9 | 5.8 | 5.7 | 5.8 | 96  |
| September Free           | USA             | 2.6 | 3.7 | 3.2 | 6.3 | 5.8 | 6.1 | 107 |
| Kashi Huang Rou Li Guang | Xinjiang, China | 2.8 | 3.6 | 3.2 | 7.0 | 6.1 | 6.6 | 86  |
| Maria Carla              | Italy           | 2.9 | 4.7 | 3.8 | 6.5 | 7.0 | 6.8 | 108 |
| Le Yuan                  | Henan, China    | 2.9 | 4.0 | 3.5 | 7.1 | 6.9 | 7.0 | 116 |
| Fantasia                 | USA             | 2.8 | 4.0 | 3.4 | 7.2 | 6.8 | 7.0 | 150 |
| Legrand                  | USA             | 2.8 | 4.4 | 3.6 | 6.6 | 6.8 | 6.7 | 151 |
| June Prince              | USA             | 2.8 | 4.2 | 3.5 | 6.1 | 6.3 | 6.2 | 101 |
| Roseprincess             | USA             | 2.9 | 4.1 | 3.5 | 7.2 | 6.7 | 7.0 | 127 |
| Mei Gui Hong             | Henan, China    | 2.6 | 3.8 | 3.2 | 6.9 | 6.0 | 6.5 | 123 |
| Flavortop                | USA             | 3.0 | 4.3 | 3.7 | 7.5 | 7.2 | 7.4 | 150 |
| Summer Beauty            | USA             | 3.0 | 4.0 | 3.5 | 7.0 | 6.4 | 6.7 | 92  |
| Croce Del Sud            | Italy           | 2.9 | 4.3 | 3.6 | 6.6 | 6.9 | 6.8 | 72  |
| Hiratsuka Red            | Japan           | 2.7 | 4.0 | 3.4 | 6.6 | 6.8 | 6.7 | 100 |
| Qin Guang                | Shaanxi, China  | 2.8 | 4.3 | 3.6 | 6.6 | 7.3 | 7.0 | 108 |
| Qin Guang 2              | Shaanxi, China  | 2.6 | 4.0 | 3.3 | 7.3 | 7.2 | 7.3 | 147 |
| Sungold                  | USA             | 2.9 | 4.4 | 3.7 | 7.5 | 6.7 | 7.1 | 140 |
| Rui Guang 3              | Beijing, China  | 3.1 | 4.3 | 3.7 | 7.3 | 7.2 | 7.3 | 150 |
| Rui Guang 7              | Beijing, China  | 2.5 | 3.4 | 3.0 | 5.7 | 5.7 | 5.7 | 110 |
| Rui Guang 19             | Beijing, China  | 2.8 | 3.6 | 3.2 | 6.7 | 6.1 | 6.4 | 110 |
| SunGlo                   | USA             | 3.0 | 4.4 | 3.7 | 7.8 | 7.1 | 7.5 | 137 |
| Sunfre                   | USA             | 2.9 | 3.8 | 3.4 | 6.5 | 6.1 | 6.3 | 117 |
| Shuang Xi Hong           | USA             | 2.7 | 3.8 | 3.3 | 6.8 | 6.6 | 6.7 | 140 |
| Suan Li Guang            | Xinjiang, China | 2.8 | 3.6 | 3.2 | 6.7 | 6.0 | 6.4 | 122 |
| Cheonhong                | Korea           | 2.5 | 3.9 | 3.2 | 7.3 | 7.1 | 7.2 | 123 |
| Tian Li Guang            | Xinjiang, China | 2.7 | 3.2 | 3.0 | 5.8 | 6.2 | 6.0 | 95  |
| Venus                    | Italy           | 3.4 | 4.6 | 4.0 | 8.2 | 7.2 | 7.7 | 150 |
| Winberger                | Italy           | 2.7 | 4.0 | 3.4 | 5.9 | 5.9 | 5.9 | 82  |
| May Grand                | USA             | 3.0 | 4.3 | 3.7 | 8.0 | 7.2 | 7.6 | 142 |
| Summer Grand             | USA             | 3.0 | 4.3 | 3.7 | 6.4 | 6.4 | 6.4 | 110 |
| Okitsu                   | Japan           | 2.8 | 4.3 | 3.6 | 7.3 | 8.4 | 7.9 | 114 |
| Snow Queen               | USA             | 2.8 | 4.1 | 3.5 | 6.5 | 6.5 | 6.5 | 125 |
| Sunsplash                | USA             | 2.7 | 3.7 | 3.2 | 6.5 | 6.1 | 6.3 | 78  |
| Early Red 2              | USA             | 3.0 | 3.8 | 3.4 | 7.0 | 6.3 | 6.7 | 121 |
| Early Grand              | USA             | 2.7 | 4.2 | 3.5 | 6.4 | 6.8 | 6.6 | 79  |
| Zheng You Zi Hong Tao    | Henan, China    | 2.9 | 3.9 | 3.4 | 6.1 | 5.9 | 6.0 | 77  |
| Zhong Nong Jin Hui       | Henan, China    | 2.8 | 4.2 | 3.5 | 6.9 | 6.8 | 6.9 | 173 |
| Zhong You Tao 8          | Henan, China    | 3.0 | 4.4 | 3.7 | 7.8 | 7.4 | 7.6 | 174 |
| Bai Dan Ban              | East China      | 2.1 | 3.6 | 2.9 | 6.2 | 5.7 | 6.0 | ?   |
| Bao Chun                 | Henan, China    | 2.2 | 3.0 | 2.6 | 4.7 | 4.6 | 4.7 | ?   |
| Beijing S9               | Beijing, China  | 2.9 | 3.8 | 3.4 | 6.8 | 7.8 | 7.3 | 150 |
| Dan Ban Zi Tao           | North China     | 2.1 | 3.5 | 2.8 | 5.9 | 6.2 | 6.1 | ?   |

|                      |                 |     |     |     |     |     |     |     |
|----------------------|-----------------|-----|-----|-----|-----|-----|-----|-----|
| Fen Shou Xing        | Jiangsu, China  | 2.4 | 3.2 | 2.8 | 5.8 | 5.8 | 5.8 | 90  |
| Hong Chui Zhi        | North China     | 1.9 | 3.1 | 2.5 | 3.9 | 4.0 | 4.0 | ?   |
| Hong Hua Bi Tao      | North China     | 1.8 | 2.8 | 2.3 | 4.0 | 4.3 | 4.2 | ?   |
| Hong Ju Hua Tao      | Henan, China    | 1.8 | 3.1 | 2.5 | 4.0 | 4.9 | 4.5 | ?   |
| Hong Shou Xing       | North China     | 2.0 | 3.0 | 2.5 | 3.6 | 3.7 | 3.7 | ?   |
| Hong Ye Tao          | North China     | 2.6 | 3.7 | 3.2 | 5.9 | 6.2 | 6.1 | ?   |
| Hua Yu Lu            | Zhejiang, China | 2.6 | 3.5 | 3.1 | 6.9 | 7.1 | 7.0 | 116 |
| Huang Jin Mei Li     | USA             | 3.0 | 4.5 | 3.8 | 8.5 | 9.5 | 9.0 | 171 |
| Jiang Tao            | USA             | 2.1 | 3.1 | 2.6 | 5.7 | 6.0 | 5.9 | ?   |
| Ju Hua Tao           | North China     | 1.8 | 3.1 | 2.5 | 3.9 | 4.7 | 4.3 |     |
| Man Tian Hong        | Henan, China    | 3.1 | 4.0 | 3.6 | 7.5 | 8.3 | 7.9 | 148 |
| Ren Mian Tao         | North China     | 2.6 | 4.2 | 3.4 | 5.4 | 6.1 | 5.8 | ?   |
| Shou Bai             | Beijing, China  | 1.8 | 2.9 | 2.4 | 4.4 | 4.4 | 4.4 | ?   |
| Shou Fen             | Beijing, China  | 1.8 | 3.0 | 2.4 | 4.7 | 4.9 | 4.8 | ?   |
| Zhu Fen Chui Zhi     | North China     | 1.8 | 2.7 | 2.3 | 3.4 | 4.0 | 3.7 | ?   |
| Okinawa              | USA             | 2.0 | 2.8 | 2.4 | 4.3 | 4.3 | 4.3 | 36  |
| Bailey               | USA             | 2.5 | 3.4 | 3.0 | 6.7 | 6.4 | 6.6 | 79  |
| Harrow Blood         | Canada          | 1.8 | 2.8 | 2.3 | 5.2 | 5.1 | 5.2 | 47  |
| Ha Lu Hong Shi Sheng | Henan, China    | 2.7 | 3.4 | 3.1 | 7.3 | 6.6 | 7.0 | 106 |
| Rutgers Redleaf      | USA             | 2.3 | 3.3 | 2.8 | 5.5 | 5.3 | 5.4 | 60  |
| Siberian C           | Canada          | 2.1 | 3.1 | 2.6 | 4.1 | 4.4 | 4.3 | 28  |
| Tsukuba 2            | Japan           | 2.0 | 3.0 | 2.5 | 5.1 | 4.6 | 4.9 | 53  |
| Tsukuba 3            | Japan           | 2.4 | 3.8 | 3.1 | 6.1 | 6.9 | 6.5 | 88  |

## Result of Radiocarbon Dating Analysis

| Sample Data | Measured<br>Radiocarbon Age | $^{13}\text{C} / ^{12}\text{C}$<br>Ratio | Conventional<br>Radiocarbon Age |
|-------------|-----------------------------|------------------------------------------|---------------------------------|
|-------------|-----------------------------|------------------------------------------|---------------------------------|

Beta - 354489 NA -27.5 o/oo > 43500 BP

SAMPL : Cying001

ANALYSIS : AMS-Standard delivery

MATERIAL/PRETREATMENT : (nutshell): acid/alkali/acid

COMMENT:

(1) A Measured Radiocarbon Age is not reported for infinite dates since corrections may imply a greater level of confidence than is appropriate.

(2) The  $^{14}\text{C}$  activity was extremely low and almost identical to the background signal. In such cases, indeterminate errors associated with the background add non-measurable uncertainty to the result. Always, the result should be considered along with other lines of evidence. The most conservative interpretation of age is infinite (i.e. greater than).

## Result of Elemental Analysis

| Element | Line Type | Apparent Concentration | k Ratio | Wt%    | Wt% Sigma | Atomic % | Standard Label | Factory Standard |
|---------|-----------|------------------------|---------|--------|-----------|----------|----------------|------------------|
| C       | K series  | 0.32                   | 0.00321 | 3.21   | 0.20      | 7.53     | C Vit          | Yes              |
| O       | K series  | 13.02                  | 0.04381 | 33.52  | 0.77      | 58.94    | SiO2           | Yes              |
| Mg      | K series  | 0.07                   | 0.00045 | 0.41   | 0.13      | 0.47     | MgO            | Yes              |
| Al      | K series  | 0.14                   | 0.00099 | 0.86   | 0.16      | 0.89     | Al2O3          | Yes              |
| Si      | K series  | 0.21                   | 0.00169 | 1.38   | 0.19      | 1.38     | SiO2           | Yes              |
| Ca      | K series  | 0.18                   | 0.00157 | 1.29   | 1.56      | 0.91     | Wollastonite   | Yes              |
| Fe      | L series  | 5.69                   | 0.05687 | 59.32  | 1.15      | 29.88    | Fe             | Yes              |
| Total:  |           |                        |         | 100.00 |           | 100.00   |                |                  |
